# Supplementary material
Source: PubMed Central journal article supplement (PMC4539579)
Supplement: NIHMS62083-supplement-Appendix_A.pdf [file NIHMS62083-supplement-Appendix_A.pdf]

## *Ecological Archives E096-015-A1*

**L. Chalmandrier, T. Münkemüller, S. Lavergne, and W. Thuiller. 2015. Effects of species' similarity and dominance on the functional and phylogenetic structure of a plant meta-community. *Ecology* 96:143–153. <http://dx.doi.org/10.1890/13-2153.1>**

APPENDIX A. Detailed information about the trait database and the phylogeny.

### **Functional traits**

We used the functional trait database ANDROSACE (AlpiNe Database ResOurce for Species And eCosystems fEatures, Thuiller et al., *unpublished*). The database includes trait information for Alpine plants from individual projects (Albert et al. 2010*a*, 2010*b*) and freely available databases such as LEDA (Knevel et al. 2003), BioFlor (Kühn et al. 2004), Ecoflora (Fitter and Peat 1994), CATMINAT (Julve 1998) and Kew Gardens (Royal Botanic Gardens Kew 2008).

### **Phylogeny**

A genus-level phylogeny of alpine plants was extracted from Thuiller et al. (2014). For this phylogeny, the authors followed the workflow proposed in Roquet et al. (2013) with DNA sequences downloaded from Genbank: three conserved chloroplastic regions (*rbcL*, *matK* and *ndhF*) and 8 regions for certain families or orders (*atpB*, ITS, *psbA-trnH*, *rpl16*, *rps4*, *rps4-trnS*, *rps16*, *trnL-F*) which were aligned separately by taxonomic clustering. All sequences were aligned with 3 methods: MUSCLE (Edgar 2004); MAFFT, (Katoh et al. 2005); Kalign, (Lassmann and Sonnhammer 2005) and checked by eye. The best alignment for each region was selected and depurated with TrimAl (Capella-Gutiérrez et al. 2009). Phylogenetic inference by maximum-likelihood (ML) was conducted with RAxML (Stamatakis 2006) applying a supertree constraint at the family-level based on Davies et al. (2004) and Moore et al. (2010). In order to obtain a phylogenetic tree with branch lengths equal to absolute evolutionary time, we dated the best ML tree with penalized-likelihood using r8s (Sanderson 2003) and 25 fossils constraints (Table A1). Finally, the tips of the phylogenetic tree were resolved with polytomies to obtain a species-level phylogeny.

TABLE A1. Fossil information and age constraints used to calibrate the branch length in the phylogeny. All the fossils were used as minimum age constraints.

| Clade         | Age | Stem/Crown | References                                                    |
|---------------|-----|------------|---------------------------------------------------------------|
| Tracheophytes | 421 | crown      | Garrat and Rickards 1987; Hueber 1992; Kenrick and Crane 1997 |

## LITERATURE CITED

- Albert, C. H., W. Thuiller, N. G. Yoccoz, R. Douzet, S. Aubert, and S. Lavorel. 2010*a*. A multi-trait approach reveals the structure and the relative importance of intra-vs. interspecific variability in plant traits. *Functional Ecology* 24:1192–1201.
- Albert, C. H., W. Thuiller, N. G. Yoccoz, A. Soudant, F. Boucher, P. Saccone, and S. Lavorel. 2010*b*. Intraspecific functional variability: extent, structure and sources of variation. *Journal of Ecology* 98:604–613.
- Batten, D. J., M. E. Collinson, and A. P. R. Brain. 1998. Ultrastructural interpretation of the Late Cretaceous megaspore *Glomerisporites pupus* and its associated microspores. *American Journal of Botany* 85:724–735.
- Call, V. B., and D. L. Dilcher. 1992. Investigations of angiosperms from the Eocene of southwestern North America: samaras of *Fraxinus wilcoxiana* berry. *Review of Palaeobotany Palynology* 74:249–266.
- Capella-Gutiérrez, S., J. M. Silla-Martínez, and T. Gabaldón. 2009. trimAl: a tool for automated alignment trimming in large-scale phylogenetic analyses. *Bioinformatics* 25:1972–1973.
- Crane, P. R., E. M. Friis, and K. R. Pedersen. 1994. Palaeobotanical evidence on the early radiation of magnoliid angiosperms. *Plant Systematics and Evolution* 8:51–72.
- Crepet, W. L., and N. C. Nixon. 1998. Fossil Clusiaceae from the Late Cretaceous (Turonian) of New Jersey and implications regarding the history of bee pollination. *American Journal of Botany* 85:1122–1133.
- Davies, T. J., T. G. Barraclough, M. W. Chase, P. S. Soltis, D. E. Soltis, and V. Savolainen. 2004. Darwin's abominable mystery: insights from a supertree of the angiosperms. *Proceedings of the National Academy of Sciences of the United States of America* 101:1904–1909.
- Doyle, J. A. 1992. Revised palynological correlations of the lower Potomac Group (USA) and the Cocobeach sequence of Gabon (Barremian-Aptian). *Cretaceous Research* 13:337–349.
- Edgar, R. C. 2004. MUSCLE: a multiple sequence alignment method with reduced time and space complexity. *BMC bioinformatics* 5:113.
- Fitter, A., and H. Peat. 1994. The ecological flora database. *Journal of Ecology* 82:415–425.
- Friis, E. M., K. R. Pedersen, and P. R. Crane. 2006*a*. Cretaceous angiosperm flowers: Innovation and evolution in plant reproduction. *Palaeogeography, Palaeoclimatology, Palaeoecology* 232:251–293.
- Friis, E. M., K. R. Pedersen, and J. Schonenberger. 2006*b*. Normapolles plants: a prominent component of the Cretaceous rosoid diversification. *Plant Systematics and Evolution* 260:107–140.

- Galtier, J., S. J. Wang, C. S. Li, and J. Hilton. 2001. A new genus of filicalean fern from the Lower Permian of China. *Botanical Journal of the Linnean Society* 137:429–442.
- Garrat, M. J., and R. B. Rickards. 1987. Pridoli (Silurian) graptolites in association with *Baragwanathia* (Lycophytina). *Bulletin of the Geological Society of Denmark* 35:135–139.
- Herendeen, P. S., and P. R. Crane. 1992. *Advances in Legume Systematics. Pt. 4. The Fossil Record.* pp 57–68. Royal Botanic Gardens, Kew, UK.
- Hermsen, E. J., M. A. Gandolfo, K. C. Nixon, and W. L. Crepet. 2003 *Divisestylus* gen. Nov. (aff. *Iteaceae*), a fossil saxifrage from the late Cretaceous of New Jersey, USA. *American Journal of Botany* 90:1373–1388.
- Hueber, F. M. 1992. Thoughts on the early lycopsids and zosterophylls. *Annals of the Missouri Botanical Garden* 79:474–499.
- Hughes, N. F., and A. B. McDougall. 1990. Barremian-Aptian angiospermid pollen records from southern England. *Review of Palaeobotany and Palynology* 65: 145–151.
- Jarzen, D. M. 1978. Some Maastrichtian palynomorphs and their phytogeographical and palaeoecological implications. *Palynology* 2:29–38.
- Julve, P. 1998, ff. *Baseflor. Index botanique, écologique et chorologique de la flore de France.*
- Katoh, K., K. Kuma, H. Toh, and T. Miyata. 2005. MAFFT version 5: improvement in accuracy of multiple sequence alignment. *Nucleic acids research* 33:511–518.
- Kenrick, P., and P. R. Crane. 1997. *The origin and early diversification of land plants—a cladistic study.* Washington (DC): Smithsonian Institution Press.
- Knevel, I., R. Bekker, J. Bakker, and M. Kleyer. 2003. Life-history traits of the Northwest European flora: The LEDA database. *Journal of Vegetation Science* 14:611–614.
- Knobloch, E. D. and D. H. Mai. 1986. *Monograph of the fruits and seeds in the Cretaceous of Central Europe.* *Rozprawy Ústředního Ústavu Geologického*, 47:1–219.
- Krassilov, V., and F. Bacchia. 2000. Cenomanian florule of Nammoura, Lebanon. *Cretaceous Research* 21:785–799.
- Kühn, I., W. Durka, and S. Klotz. 2004. *BiolFlor* — a new plant-trait database as a tool for plant invasion ecology. *Diversity and Distributions* 10: 363–365.
- Lassmann, T., and E. L. Sonnhammer. 2005. *Kalign*—an accurate and fast multiple sequence alignment algorithm. *BMC bioinformatics* 6:298.
- Lupia, R., H. Schneider, G. M. Moeser, K. M. Pryer, and P. R. Crane. 2000. *Marsileaceae* sporocarps and spores from the Late Cretaceous of Georgia, U.S.A. *International Journal of Plant Sciences* 161:975–988.

- Magallon, S. 1997. Affinity within Hydrangeaceae of a structurally preserved Late Cretaceous flower (Coniacian-Santonian of Georgia, U.S.A). *American Journal of Botany* 84 (Suppl.): 215.
- Manchester, S. R., and M. J. Donoghue. 1995. Winged fruits of Linnaceae (Caprifoliaceae) in the Tertiary of western North America: *Diplodipelta* gen. nov. *International Journal of Plant Sciences* 156:709–722.
- Mapes, G., and G. W. Rothwell. 1984. Permineralized ovulate cones of *Lebachia* from Late Paleozoic Hamilton Quarry area in southeastern Kansas. *Palaeontology* 27:69–94.
- Mapes, G., and G. W. Rothwell. 1991. Structure and relationship of primitive conifers. *Neues Jahrbuch für Geologie und Palaeontologie* 183:269–287.
- Miller, C.N. 1971. Evolution of the fern family Osmundaceae based on anatomical studies. *Museum of Paleontology of the University of Michigan* [Contribution 28:105–169]
- Miller, C.N. 1999. Implications of fossil conifers for the phylogenetic relationships of living families. *The Botanical Review*. 65:239–277.
- Moore, M. J., P. S. Soltis, C. D. Bell, J. G. Burleigh, and D. E. Soltis. 2010. Phylogenetic analysis of 83 plastid genes further resolves the early diversification of eudicots. *Proceedings of the National Academy of Sciences* 107:4623–4628.
- Muller, J. 1981. Fossil pollen records of extant angiosperms. *The Botanical Review* 47:1–142.
- Nixon, K. C., and W. L. Crepet. 1993. Late Cretaceous fossil flowers of ericalean affinity. *American Journal of Botany* 80:616–623.
- Phipps, C. J., T. Taylor, E. Taylor, R. Cúneo, L. Boucher, and X. Yao. 1998. *Osmunda* (Osmundaceae). from the Triassic of Antarctica: an example of evolutionary stasis. *American Journal of Botany* 85:888–895.
- Pryer, K. M. 1999. Phylogeny of marsileaceous ferns and relationships of the fossil *Hydropteris pinnata* reconsidered. *International Journal of Plant Sciences* 160:931–954.
- Roquet, C., W. Thuiller, and S. Lavergne. 2013. Building megaphylogenies for macroecology: taking up the challenge. *Ecography* 36:013–026.
- Röbber, R., and J. Galtier. 2002. First *Grammatopteris* tree ferns from the Southern Hemisphere—new insights in the evolution of the Osmundaceae from the Permian of Brazil. *Review of Palaeobotany and Palynology* 121:205–230.
- Rothwell, G.W., and S. E. Scheckler. 1998. *Origin and Evolution of Gymnosperms*. Pp 85–134. Columbia University Press, New York, New York, USA.
- Royal Botanic Gardens Kew. 2008. Seed Information Database (SID). Version 7.1. Available from: <http://data.kew.org/sid/>
- Sanderson, M. J. 2003. r8s: inferring absolute rates of molecular evolution and divergence times in

the absence of a molecular clock. *Bioinformatics* 19:301–302.

Stamatakis, A. 2006. RAxML-VI-HPC: maximum likelihood-based phylogenetic analyses with thousands of taxa and mixed models. *Bioinformatics* 22:2688–2690.

Takahashi, M., P. R. Crane, and H. Ando. 1999. *Esgueiria futabensis* sp. nov., a new angiosperm flower from the Upper Cretaceous (lower Coniacian) of northeastern Honshu, Japan. *Paleontological Research* 3:81–87.

Thuiller, W., M. Guéguen, D. Georges, R. Bonet, L. Chalmandrier, L. Garraud, J. Renaud, C. Roquet, J. Van Es, N. E. Zimmermann, and S. Lavergne. 2014. Are different facets of plant diversity well protected against climate and land cover changes? A test study in the French Alps. *Ecography*:10.1111/ecog.00670.

Van Uffelen, G. A. 1991. Fossil Polypodiaceae and their spores. *Blumea* 36:253–272.

Wolfe, J. A. 1976. Stratigraphic distribution of some pollen types from the Campanian and lower Maestrichtian rocks (Upper Cretaceous) of the middle Atlantic states. U.S. Geological Survey Professional Paper 997:1–108.

Yamada, T., and M. Kato. 2002. *Regnellites nagashimae* gen. et sp. nov., the oldest macrofossil of Marsileaceae, from the Upper Jurassic to Lower Cretaceous of Western Japan. *International Journal of Plant Sciences* 163:715–722.

[\[Back to E096-015\]](#)
